## Correction

# Correction: Role of TRPV1 Channels in Ischemia/Reperfusion-Induced Acute Kidney Injury

The *PLOS ONE* Staff

The Acknowledgments section of the published article contains errors. Please view the correct Acknowledgments here:

We thank Joon-Keun Park (Hannover Medical School, Hannover, Germany) for performing analytical analyses of serum creatinine levels. We thank Marwan Mannaa, Gabriele N'diaye, May-Britt Köhler and Petra Berkefeld for expert technical advice and help in experiments.

## Reference

1. Chen L, Markó L, Kaßmann M, Zhu Y, Wu K, et al. (2014) Role of TRPV1 Channels in Ischemia/Reperfusion-Induced Acute Kidney Injury. *PLoS ONE* 9(10): e109842. doi:10.1371/journal.pone.0109842

---

**Citation:** The *PLOS ONE* Staff (2014) Correction: Role of TRPV1 Channels in Ischemia/Reperfusion-Induced Acute Kidney Injury. *PLoS ONE* 9(12): e115469. doi:10.1371/journal.pone.0115469

**Published:** December 9, 2014

**Copyright:** © 2014 The *PLOS ONE* Staff. This is an open-access article distributed under the terms of the Creative Commons Attribution License, which permits unrestricted use, distribution, and reproduction in any medium, provided the original author and source are credited.
